# Supplementary material for: Exceptional Evolutionary Divergence of Human Muscle and Brain Metabolomes Parallels Human Cognitive and Physical Uniqueness
Source: PubMed Central journal article supplement (PMC4035273; doi:10.1371/journal.pbio.1001871), 2014-05-27

### Enzyme expression

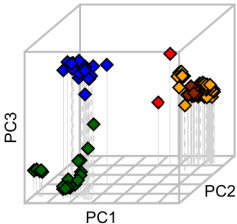

- ◆ PFC
- ◆ CBC
- ◆ V1
- ◆ kidney
- ◆ muscle

### Enzymes

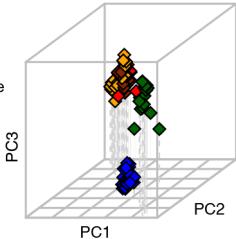

Supplement: pbio.1001871.s006.pdf [file pbio.1001871.s006.pdf]
