# Supplementary material for: Exceptional Evolutionary Divergence of Human Muscle and Brain Metabolomes Parallels Human Cognitive and Physical Uniqueness
Source: PubMed Central journal article supplement (PMC4035273; doi:10.1371/journal.pbio.1001871), 2014-05-27

## High-concentration peaks

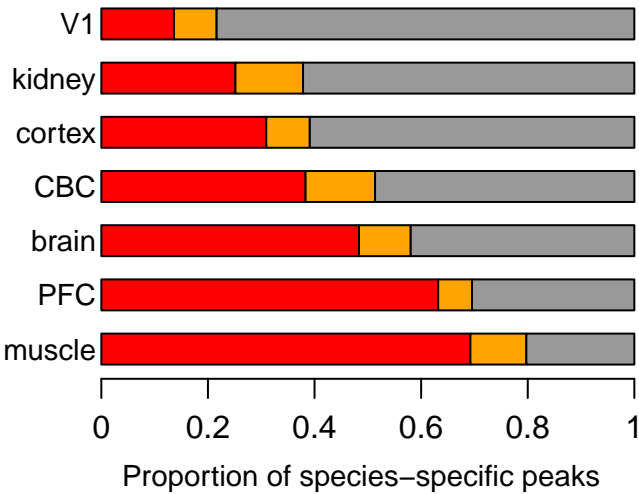

Supplement: pbio.1001871.s009.pdf [file pbio.1001871.s009.pdf]
