# Supplementary material for: Exceptional Evolutionary Divergence of Human Muscle and Brain Metabolomes Parallels Human Cognitive and Physical Uniqueness
Source: PLoS Biol. 2014 May 27;12(5):e1001871. doi: 10.1371/journal.pbio.1001871 (PMC4035273; doi:10.1371/journal.pbio.1001871)
Supplement: Table S5 — Functional analysis of metabolite variation among tissues. KEGG pathways with significant overrepresentation of metabolites in 13 metabolite peak clusters, obtained by grouping metabolite peaks according to their concentration profiles across tissues. (XLSX) [file pbio.1001871.s020.xlsx]

## Sheet: sheet1
Cluster 1	muscle
pathway ID	pathway	p-value	cluster metabolites	tissue eznymes	enzymes p-value	linked enzymes	linkes enz. p-value
path:map00010	Glycolysis / Gluconeogenesis	0.00402686	9	14	0	7	0
path:map00051	Fructose and mannose metabolism	6.98971e-07	14	10	0	4	0.01
path:map00030	Pentose phosphate pathway	0.00571237	8	10	0	2	0.04
path:map04964	Proximal tubule bicarbonate reclamation	0.00105238	6	5	0.02	1	0.05
path:map05211	Renal cell carcinoma	0	3	19	0.02	0	1
path:map00052	Galactose metabolism	7.53942e-10	17	7	0.02	0	1
path:map00330	Arginine and proline metabolism	0.000343167	20	12	0.03	8	0
path:map00620	Pyruvate metabolism	0.0198774	6	10	0.03	0	1
path:map00250	Alanine, aspartate and glutamate metabolism	0.00801243	12	6	0.05	4	0.02
path:map00760	Nicotinate and nicotinamide metabolism	0.0218186	7	5	0.09	0	1
path:map00340	Histidine metabolism	1.4497e-05	14	3	0.45	4	0
path:map00650	Butanoate metabolism	0.0198774	6	1	0.89	1	0.03
path:map00500	Starch and sucrose metabolism	6.98297e-05	16	7	0.24	2	0.04
path:map04727	GABAergic synapse	0.0109227	4	8	0.43	2	0.04
path:map00240	Pyrimidine metabolism	1.90575e-06	19	3	1	4	0.04
path:map00260	Glycine, serine and threonine metabolism	0.0134601	16	4	0.66	1	0.06
path:map00230	Purine metabolism	3.98548e-05	21	18	0.13	13	0.1
path:map00750	Vitamin B6 metabolism	0.00439754	7	1	0.44	1	0.1
path:map05032	Morphine addiction	0.00337579	3	7	0.63	2	0.26
path:map00910	Nitrogen metabolism	0.000569573	9	4	0.12	0	1
path:map05014	Amyotrophic lateral sclerosis (ALS)	0.0140272	2	4	0.14	0	1
path:map05034	Alcoholism	0.0136327	3	9	0.18	0	1
path:map00900	Terpenoid backbone biosynthesis	0	2	3	0.22	0	1
path:map02010	ABC transporters	6.49539e-05	21	2	0.27	0	1
path:map00190	Oxidative phosphorylation	0.0164316	5	12	0.29	0	1
path:map00524	Butirosin and neomycin biosynthesis	0	4	1	0.3	0	1
path:map04721	Synaptic vesicle cycle	0.00108373	5	4	0.32	0	1
path:map00020	Citrate cycle (TCA cycle)	0.00317004	8	4	0.38	0	1
path:map04150	mTOR signaling pathway	0	2	6	0.4	0	1
path:map04340	Hedgehog signaling pathway	0	1	4	0.55	0	1
path:map05217	Basal cell carcinoma	0	1	4	0.55	0	1
path:map00270	Cysteine and methionine metabolism	0.0080306	14	3	0.61	0	1
path:map00630	Glyoxylate and dicarboxylate metabolism	0.00119266	9	2	0.68	0	1
path:map00920	Sulfur metabolism	0.0233802	4	1	0.7	0	1
path:map05016	Huntington's disease	0	2	7	0.87	0	1
path:map00520	Amino sugar and nucleotide sugar metabolism	1.46819e-07	23	3	0.87	0	1
path:map00360	Phenylalanine metabolism	0.0158562	9	1	0.92	0	1
path:map00040	Pentose and glucuronate interconversions	0.00736466	10	1	0.95	0	1
path:map05031	Amphetamine addiction	0.0459816	2	2	0.95	0	1
path:map00785	Lipoic acid metabolism	0	1	0	1	0	1
path:map00830	Retinol metabolism	0	2	1	1	0	1
path:map05033	Nicotine addiction	0	3	0	1	0	1
path:map00300	Lysine biosynthesis	0.0002956	6	0	1	0	1
path:map00472	D-Arginine and D-ornithine metabolism	0.0140272	2	0	1	0	1
path:map00740	Riboflavin metabolism	0.0140272	2	0	1	0	1
path:map04080	Neuroactive ligand-receptor interaction	0.0320355	9	2	1	0	1
path:map00970	Aminoacyl-tRNA biosynthesis	0.0434026	9	0	1	0	1
path:map05030	Cocaine addiction	0.0459816	2	0	1	0	1
path:map00053	Ascorbate and aldarate metabolism	0.0472805	6	0	1	0	1
Cluster 2	brain
pathway ID	pathway	p-value	cluster metabolites	tissue eznymes	enzymes p-value	linked enzymes	linkes enz. p-value
path:map00250	Alanine, aspartate and glutamate metabolism	0.000441121	11	7	0.01	2	0.02
path:map04744	Phototransduction	0	1	4	0.13	0	1
path:map00640	Propanoate metabolism	0.000159611	7	5	0.28	0	1
path:map00471	D-Glutamine and D-glutamate metabolism	0.000132552	5	1	0.35	0	1
path:map00630	Glyoxylate and dicarboxylate metabolism	0.00424074	6	4	0.36	0	1
path:map00310	Lysine degradation	0.00923081	4	7	0.36	0	1
path:map00480	Glutathione metabolism	0.000354451	7	6	0.46	0	1
path:map00270	Cysteine and methionine metabolism	0.00690034	11	4	0.48	0	1
path:map00450	Selenocompound metabolism	0	1	3	0.55	0	1
path:map00565	Ether lipid metabolism	0.0283195	1	4	0.63	0	1
path:map00240	Pyrimidine metabolism	0.000293352	13	3	0.99	0	1
path:map00785	Lipoic acid metabolism	0	1	0	1	0	1
path:map00300	Lysine biosynthesis	0.000132552	5	0	1	0	1
path:map00053	Ascorbate and aldarate metabolism	0.000354451	7	0	1	0	1
Cluster 3	kidney					1
pathway ID	pathway	p-value	cluster metabolites	tissue eznymes	enzymes p-value	linked enzymes	linkes enz. p-value
path:map04974	Protein digestion and absorption	0.00854854	9	17	0	2	0
path:map00760	Nicotinate and nicotinamide metabolism	0.00278189	6	6	0	1	0.02
path:map00380	Tryptophan metabolism	7.13006e-05	11	12	0	3	0.15
path:map04960	Aldosterone-regulated sodium reabsorption	0	3	7	0	0	1
path:map00140	Steroid hormone biosynthesis	0.00121543	7	16	0	0	1
path:map00120	Primary bile acid biosynthesis	0.00856057	6	9	0	0	1
path:map00150	Androgen and Estrogen Metabolism	0.017822	1	13	0	0	1
path:map00053	Ascorbate and aldarate metabolism	0.0397235	4	15	0	0	1
path:map00830	Retinol metabolism	0.0487254	1	24	0	0	1
path:map00350	Tyrosine metabolism	2.24728e-05	14	8	0.01	3	0.02
path:map00770	Pantothenate and CoA biosynthesis	0.0296372	4	5	0.01	0	1
path:map00430	Taurine and hypotaurine metabolism	0.0340332	3	3	0.02	2	0.04
path:map04976	Bile secretion	0.00116486	9	9	0.04	1	0.25
path:map05132	Salmonella infection	0	1	3	0.1	0	1
path:map00620	Pyruvate metabolism	0.0296372	4	7	0.13	6	0.01
path:map03013	RNA transport	0	1	2	0.14	0	1
path:map05142	Chagas disease (American trypanosomiasis)	0	1	6	0.15	0	1
path:map00020	Citrate cycle (TCA cycle)	0.0134743	5	4	0.34	3	0.21
path:map00740	Riboflavin metabolism	0.0487254	1	2	0.37	0	1
path:map00750	Vitamin B6 metabolism	0.0479869	3	1	0.41	0	1
path:map00360	Phenylalanine metabolism	0.00392424	7	3	0.43	1	0.2
path:map00640	Propanoate metabolism	0.00410324	5	3	0.44	0	1
path:map04122	Sulfur relay system	0.00237035	2	1	0.48	0	1
path:map00240	Pyrimidine metabolism	0.0300663	8	7	0.6	7	0.92
path:map05133	Pertussis	0.017822	1	1	0.88	0	1
path:map00970	Aminoacyl-tRNA biosynthesis	0.0325446	6	1	0.97	0	1
path:map00785	Lipoic acid metabolism	0	1	0	1	0	1
path:map00300	Lysine biosynthesis	0.0141168	3	0	1	0	1
Cluster 4	muscle
pathway ID	pathway	p-value	cluster metabolites	tissue eznymes	enzymes p-value	linked enzymes	linkes enz. p-value
path:map00051	Fructose and mannose metabolism	9.90791e-06	9	10	0	3	0.06
path:map05410	Hypertrophic cardiomyopathy (HCM)	0	1	7	0	0	1
path:map00030	Pentose phosphate pathway	0.0106295	5	10	0	0	1
path:map00620	Pyruvate metabolism	0.021726	3	10	0	0	1
path:map00052	Galactose metabolism	0.00115245	7	7	0.02	5	0.01
path:map00010	Glycolysis / Gluconeogenesis	1.71814e-05	9	14	0.02	2	0.04
path:map04930	Type II diabetes mellitus	0.0110302	1	5	0.07	0	1
path:map00910	Nitrogen metabolism	0.00783577	4	4	0.11	1	0.03
path:map05152	Tuberculosis	0.0307864	1	7	0.12	0	1
path:map00230	Purine metabolism	0.00126519	10	18	0.15	4	0.79
path:map04145	Phagosome	0	1	6	0.19	0	1
path:map00410	beta-Alanine metabolism	0.0397862	3	4	0.21	5	0
path:map05014	Amyotrophic lateral sclerosis (ALS)	0.0307864	1	4	0.25	0	1
path:map00524	Butirosin and neomycin biosynthesis	0.0307864	1	1	0.27	0	1
path:map00190	Oxidative phosphorylation	8.17778e-05	5	12	0.29	0	1
path:map04150	mTOR signaling pathway	0	2	6	0.3	0	1
path:map04721	Synaptic vesicle cycle	0.00979686	2	4	0.43	0	1
path:map00340	Histidine metabolism	8.10648e-05	8	3	0.51	5	0
path:map05012	Parkinson's disease	0.000549691	3	8	0.53	0	1
path:map04144	Endocytosis	0.00115205	2	5	0.55	0	1
path:map00562	Inositol phosphate metabolism	1.31976e-08	10	5	0.56	0	1
path:map04070	Phosphatidylinositol signaling system	0.00387275	7	6	0.64	0	1
path:map05133	Pertussis	0.00115205	2	2	0.66	0	1
path:map04142	Lysosome	0.00424856	2	4	0.69	0	1
path:map00520	Amino sugar and nucleotide sugar metabolism	0.000128664	11	3	0.85	1	0.03
path:map00472	D-Arginine and D-ornithine metabolism	0.0307864	1	0	1	0	1
path:map05033	Nicotine addiction	0.0307864	1	0	1	0	1
Cluster 5	muscle
pathway ID	pathway	p-value	cluster metabolites	tissue eznymes	enzymes p-value	linked enzymes	linkes enz. p-value
path:map00620	Pyruvate metabolism	0.00486867	5	10	0	3	0
path:map04964	Proximal tubule bicarbonate reclamation	0.000146837	5	5	0.01	2	0.04
path:map04974	Protein digestion and absorption	0.00256067	10	7	0.02	1	0
path:map05211	Renal cell carcinoma	0	2	19	0.02	0	1
path:map00250	Alanine, aspartate and glutamate metabolism	0.0470596	6	6	0.04	9	0
path:map00910	Nitrogen metabolism	0.00017351	7	4	0.09	3	0
path:map00260	Glycine, serine and threonine metabolism	0.0110284	10	4	0.71	3	0
path:map00270	Cysteine and methionine metabolism	0.00337547	10	3	0.59	2	0.01
path:map00460	Cyanoamino acid metabolism	4.92038e-05	4	1	0.57	1	0.03
path:map00650	Butanoate metabolism	0.00680644	4	1	0.92	1	0.03
path:map01040	Biosynthesis of unsaturated fatty acids	0.0210956	2	1	0.75	1	0.04
path:map04744	Phototransduction	0	1	1	0.83	1	0.11
path:map00230	Purine metabolism	0.0292457	9	18	0.16	9	0.37
path:map00240	Pyrimidine metabolism	1.75289e-05	12	3	1	6	0.66
path:map00020	Citrate cycle (TCA cycle)	0.00486867	5	4	0.33	1	0.9
path:map00310	Lysine degradation	0.00486867	5	2	0.97	1	0.94
path:map00400	Phenylalanine, tyrosine and tryptophan biosynthesis	0.00680644	4	3	0.11	0	1
path:map05034	Alcoholism	0.000359396	3	9	0.13	0	1
path:map02010	ABC transporters	0.00146537	12	2	0.29	0	1
path:map00524	Butirosin and neomycin biosynthesis	0.0190439	1	1	0.31	0	1
path:map04721	Synaptic vesicle cycle	0.00160017	3	4	0.36	0	1
path:map04978	Mineral absorption	0.015787	5	5	0.39	0	1
path:map00750	Vitamin B6 metabolism	0.0379784	3	1	0.41	0	1
path:map00630	Glyoxylate and dicarboxylate metabolism	0.0021553	6	2	0.56	0	1
path:map00340	Histidine metabolism	0.0185419	6	3	0.57	0	1
path:map00520	Amino sugar and nucleotide sugar metabolism	0.0130267	8	3	0.72	0	1
path:map05016	Huntington's disease	0	1	7	0.84	0	1
path:map00670	One carbon pool by folate	0.0210956	2	1	0.85	0	1
path:map00860	Porphyrin and chlorophyll metabolism	0.0158758	3	2	0.87	0	1
path:map00040	Pentose and glucuronate interconversions	0.00025666	8	1	0.9	0	1
path:map05031	Amphetamine addiction	0.00261913	2	2	0.92	0	1
path:map00565	Ether lipid metabolism	0	1	1	0.97	0	1
path:map00280	Valine, leucine and isoleucine degradation	0.00296216	5	1	0.99	0	1
path:map00785	Lipoic acid metabolism	0	1	0	1	0	1
path:map00970	Aminoacyl-tRNA biosynthesis	1.31556e-05	11	0	1	0	1
path:map00072	Synthesis and degradation of ketone bodies	0.00261913	2	0	1	0	1
path:map05030	Cocaine addiction	0.00261913	2	0	1	0	1
path:map00290	Valine, leucine and isoleucine biosynthesis	0.00680644	4	0	1	0	1
path:map00300	Lysine biosynthesis	0.00889789	3	0	1	0	1
path:map04080	Neuroactive ligand-receptor interaction	0.0185419	6	2	1	0	1
path:map00780	Biotin metabolism	0.0190439	1	0	1	0	1
path:map00380	Tryptophan metabolism	0.0199234	7	1	1	0	1
path:map00730	Thiamine metabolism	0.0210956	2	0	1	0	1
Cluster 6	brain					4
pathway ID	pathway	p-value	cluster metabolites	tissue eznymes	enzymes p-value	linked enzymes	linkes enz. p-value
path:map04080	Neuroactive ligand-receptor interaction	0.0235081	7	41	0	23	0
path:map01040	Biosynthesis of unsaturated fatty acids	0.0330756	3	7	0	4	0
path:map05133	Pertussis	0.00495416	2	7	0.01	0	1
path:map00430	Taurine and hypotaurine metabolism	0.000106431	6	4	0.02	8	0
path:map04930	Type II diabetes mellitus	0.0291211	1	7	0.04	0	1
path:map04122	Sulfur relay system	0	3	3	0.05	0	1
path:map00250	Alanine, aspartate and glutamate metabolism	0.0297193	8	7	0.06	20	0
path:map00410	beta-Alanine metabolism	0.00145721	6	6	0.08	5	0
path:map00460	Cyanoamino acid metabolism	0.0377805	2	3	0.1	2	0
path:map00061	Fatty acid biosynthesis	0.00495416	2	1	0.47	1	0.03
path:map00120	Primary bile acid biosynthesis	1.21724e-09	14	6	0.14	1	0.26
path:map00270	Cysteine and methionine metabolism	0.0428226	9	4	0.45	2	0.4
path:map00260	Glycine, serine and threonine metabolism	0.00451861	13	4	0.74	5	0.55
path:map00052	Galactose metabolism	0.0133314	8	3	0.73	7	0.97
path:map05410	Hypertrophic cardiomyopathy (HCM)	0	1	5	0.12	0	1
path:map04974	Protein digestion and absorption	0.0044412	11	6	0.17	0	1
path:map00310	Lysine degradation	3.36272e-06	9	7	0.3	0	1
path:map04978	Mineral absorption	0.0415413	5	6	0.3	0	1
path:map00450	Selenocompound metabolism	0	1	3	0.55	0	1
path:map00380	Tryptophan metabolism	0.049853	7	7	0.56	1	1
path:map04973	Carbohydrate digestion and absorption	0.0411604	6	3	0.67	0	1
path:map04142	Lysosome	0.0172934	2	5	0.68	0	1
path:map00340	Histidine metabolism	0.00976941	8	2	0.87	1	1
path:map00970	Aminoacyl-tRNA biosynthesis	0.0133314	8	1	0.99	0	1
path:map02010	ABC transporters	1.08316e-05	18	0	1	0	1
path:map00730	Thiamine metabolism	0.00221016	4	0	1	0	1
path:map00140	Steroid hormone biosynthesis	0.00392883	7	1	1	0	1
path:map00300	Lysine biosynthesis	0.00507072	4	0	1	0	1
path:map00920	Sulfur metabolism	0.00507072	4	0	1	0	1
path:map00150	Androgen and Estrogen Metabolism	0.0291211	1	0	1	0	1
Cluster 7	kidney
pathway ID	pathway	p-value	cluster metabolites	tissue eznymes	enzymes p-value	linked enzymes	linkes enz. p-value
path:map04964	Proximal tubule bicarbonate reclamation	0.0448077	2	6	0	1	0.09
path:map00250	Alanine, aspartate and glutamate metabolism	0.00810461	6	8	0	2	0.19
path:map00330	Arginine and proline metabolism	2.54678e-07	15	15	0	2	0.29
path:map00150	Androgen and Estrogen Metabolism	0.00878216	1	13	0	0	1
path:map00472	D-Arginine and D-ornithine metabolism	0.0247116	1	2	0	0	1
path:map00140	Steroid hormone biosynthesis	0.0356204	3	16	0	0	1
path:map00280	Valine, leucine and isoleucine degradation	0.000623298	5	9	0.01	1	0.08
path:map04960	Aldosterone-regulated sodium reabsorption	0	1	7	0.01	0	1
path:map00350	Tyrosine metabolism	0.0299425	6	8	0.02	5	0
path:map00750	Vitamin B6 metabolism	0.0274073	3	1	0.39	1	0.02
path:map00072	Synthesis and degradation of ketone bodies	0.0463808	1	2	0.15	2	0.07
path:map05142	Chagas disease (American trypanosomiasis)	0	1	6	0.08	0	1
path:map00062	Fatty acid elongation	0.0463808	1	3	0.18	0	1
path:map00780	Biotin metabolism	0.00878216	1	1	0.19	0	1
path:map04114	Oocyte meiosis	0	1	5	0.25	0	1
path:map04670	Leukocyte transendothelial migration	0	1	14	0.26	0	1
path:map05414	Dilated cardiomyopathy	0	1	4	0.31	0	1
path:map05166	HTLV-I infection	0	1	6	0.34	0	1
path:map04710	Circadian rhythm - mammal	0	1	4	0.47	0	1
path:map05020	Prion diseases	0	1	4	0.62	0	1
path:map05215	Prostate cancer	0	1	5	0.68	0	1
path:map04914	Progesterone-mediated oocyte maturation	0	1	9	0.82	0	1
path:map04962	Vasopressin-regulated water reabsorption	0	1	1	0.87	0	1
path:map05032	Morphine addiction	0.00304248	2	4	0.94	0	1
path:map05034	Alcoholism	0.00708009	2	3	0.97	0	1
path:map04740	Olfactory transduction	0	1	0	1	0	1
path:map00290	Valine, leucine and isoleucine biosynthesis	9.72458e-05	5	0	1	0	1
path:map00471	D-Glutamine and D-glutamate metabolism	0.00210776	3	0	1	0	1
Cluster 8	PFC
pathway ID	pathway	p-value	cluster metabolites	tissue eznymes	enzymes p-value	linked enzymes	linkes enz. p-value
path:map04974	Protein digestion and absorption	1.95244e-06	12	9	0.45	1	0.05
path:map04978	Mineral absorption	2.11528e-06	8	10	0.53	0	1
path:map00280	Valine, leucine and isoleucine degradation	3.23764e-06	7	3	1	0	1
path:map00970	Aminoacyl-tRNA biosynthesis	1.76854e-05	9	6	0.97	1	0.33
path:map00290	Valine, leucine and isoleucine biosynthesis	7.58531e-05	5	0	1	0	1
path:map00040	Pentose and glucuronate interconversions	0.000556598	7	1	1	0	1
path:map02010	ABC transporters	0.000831465	10	1	0.96	0	1
path:map00400	Phenylalanine, tyrosine and tryptophan biosynthesis	0.000968165	4	8	0.04	0	1
path:map00360	Phenylalanine metabolism	0.00166613	6	10	0.11	0	1
path:map00130	Ubiquinone and other terpenoid-quinone biosynthesis	0.00267619	2	2	0.73	0	1
path:map05032	Morphine addiction	0.00267619	2	34	0	0	1
path:map00310	Lysine degradation	0.00394709	4	6	0.99	0	1
path:map00650	Butanoate metabolism	0.00569761	4	3	0.98	0	1
path:map00565	Ether lipid metabolism	0.00804516	1	14	0.17	0	1
path:map04150	mTOR signaling pathway	0.00804516	1	15	0.41	0	1
path:map00830	Retinol metabolism	0.022702	1	3	1	0	1
path:map05033	Nicotine addiction	0.022702	1	14	0	0	1
path:map00072	Synthesis and degradation of ketone bodies	0.0427279	1	2	0.56	0	1
path:map05030	Cocaine addiction	0.0427279	1	7	0.78	0	1
path:map05031	Amphetamine addiction	0.0427279	1	12	0.51	0	1
path:map00350	Tyrosine metabolism	0.0429219	6	12	0.31	0	1
Cluster 9	muscle
pathway ID	pathway	p-value	cluster metabolites	tissue eznymes	enzymes p-value	linked enzymes	linkes enz. p-value
path:map00534	Glycosaminoglycan biosynthesis - heparan sulfate	0	1	0	1	0	1
path:map03320	PPAR signaling pathway	0	1	10	0.26	0	1
path:map04672	Intestinal immune network for IgA production	0	1	0	1	0	1
path:map05222	Small cell lung cancer	0	1	6	0.46	0	1
path:map00230	Purine metabolism	0.000269694	8	18	0.15	8	0.05
path:map00190	Oxidative phosphorylation	0.000886184	3	12	0.26	0	1
path:map05012	Parkinson's disease	0.000953092	2	8	0.6	0	1
path:map00360	Phenylalanine metabolism	0.00316139	4	1	0.89	0	1
path:map04144	Endocytosis	0.00400034	1	5	0.55	0	1
path:map04150	mTOR signaling pathway	0.00400034	1	6	0.35	0	1
path:map00020	Citrate cycle (TCA cycle)	0.00513306	3	4	0.35	1	0.44
path:map04142	Lysosome	0.0115012	1	4	0.68	0	1
path:map05032	Morphine addiction	0.0220494	1	7	0.7	4	0.2
path:map00650	Butanoate metabolism	0.0282914	2	1	0.96	1	0.26
path:map00520	Amino sugar and nucleotide sugar metabolism	0.0286631	4	3	0.69	1	0.05
path:map00120	Primary bile acid biosynthesis	0.033872	3	0	1	0	1
path:map00670	One carbon pool by folate	0.0352341	1	1	0.79	0	1
path:map00280	Valine, leucine and isoleucine degradation	0.0446975	2	1	0.97	0	1
path:map00640	Propanoate metabolism	0.0446975	2	6	0.04	2	0.01
Cluster 10	brain
pathway ID	pathway	p-value	cluster metabolites	tissue eznymes	enzymes p-value	linked enzymes	linkes enz. p-value
path:map00053	Ascorbate and aldarate metabolism	5.96449e-05	6	0	1	0	1
path:map00052	Galactose metabolism	0.00100525	7	3	0.75	0	1
path:map00640	Propanoate metabolism	0.00199353	4	5	0.2	1	0.31
path:map00630	Glyoxylate and dicarboxylate metabolism	0.00322331	5	4	0.36	0	1
path:map04910	Insulin signaling pathway	0.00880791	1	29	0.06	0	1
path:map04930	Type II diabetes mellitus	0.00880791	1	7	0.01	0	1
path:map00830	Retinol metabolism	0.0247877	1	6	0.68	0	1
path:map00650	Butanoate metabolism	0.0356513	3	8	0	0	1
path:map00010	Glycolysis / Gluconeogenesis	0.0406217	4	7	0.73	0	1
Cluster 11	kidney
pathway ID	pathway	p-value	cluster metabolites	tissue eznymes	enzymes p-value	linked enzymes	linkes enz. p-value
path:map00534	Glycosaminoglycan biosynthesis - heparan sulfate	0	1	3	0.13	2	0.06
path:map03013	RNA transport	0	1	2	0.14	2	0.05
path:map04150	mTOR signaling pathway	0	2	4	0.67	0	1
path:map04960	Aldosterone-regulated sodium reabsorption	0	1	7	0	1	0.05
path:map00230	Purine metabolism	6.28638e-10	17	11	0.79	20	0.02
path:map00020	Citrate cycle (TCA cycle)	1.16626e-05	7	4	0.32	3	0.2
path:map00030	Pentose phosphate pathway	0.000637297	6	3	0.43	2	0.99
path:map00562	Inositol phosphate metabolism	0.00151097	5	6	0.34	1	0.09
path:map00630	Glyoxylate and dicarboxylate metabolism	0.00151097	5	8	0	0	1
path:map00190	Oxidative phosphorylation	0.00163357	4	6	0.87	0	1
path:map00250	Alanine, aspartate and glutamate metabolism	0.00355786	6	8	0.01	3	0
path:map05012	Parkinson's disease	0.00462719	2	0	1	0	1
path:map00053	Ascorbate and aldarate metabolism	0.00506507	4	15	0	0	1
path:map00340	Histidine metabolism	0.00646744	5	6	0.03	0	1
path:map05215	Prostate cancer	0.00652735	1	5	0.75	0	1
path:map00010	Glycolysis / Gluconeogenesis	0.0101805	5	12	0	4	0.01
path:map04144	Endocytosis	0.0185354	1	5	0.53	0	1
Cluster 12	cortex
pathway ID	pathway	p-value	cluster metabolites	tissue eznymes	enzymes p-value	linked enzymes	linkes enz. p-value
path:map05033	Nicotine addiction	0.00275193	1	15	0	0	1
path:map05032	Morphine addiction	0.00539454	1	33	0	0	1
path:map04742	Taste transduction	0.0129576	1	7	0.23	0	1
path:map00910	Nitrogen metabolism	0.00974961	2	5	0.5	0	1
path:map04721	Synaptic vesicle cycle	0.0177828	1	7	0.67	0	1
path:map00740	Riboflavin metabolism	0.00275193	1	2	0.83	0	1
path:map00340	Histidine metabolism	0.0356283	2	5	0.84	0	1
path:map00410	beta-Alanine metabolism	0.00797308	2	4	0.89	0	1
path:map00051	Fructose and mannose metabolism	0.0396174	2	5	0.92	3	0.92
path:map00030	Pentose phosphate pathway	0.0249913	2	4	0.95	0	1
path:map01040	Biosynthesis of unsaturated fatty acids	0.0232435	1	1	0.99	0	1
path:map04744	Phototransduction	0	1	0	1	0	1
path:map00040	Pentose and glucuronate interconversions	0.00467276	3	1	1	0	1
Cluster 13	CBC
pathway ID	pathway	p-value	cluster metabolites	tissue eznymes	enzymes p-value	linked enzymes	linkes enz. p-value
path:map03013	RNA transport	0	1	1	0.86	0	1
path:map00471	D-Glutamine and D-glutamate metabolism	0.000153002	3	1	0.57	0	1
path:map00670	One carbon pool by folate	0.00190053	2	4	0.51	0	1
path:map05016	Huntington's disease	0.00225809	1	19	0.98	0	1
path:map04727	GABAergic synapse	0.00321117	2	26	0.03	8	0.17
path:map00910	Nitrogen metabolism	0.00443759	3	5	0.54	0	1
path:map05014	Amyotrophic lateral sclerosis (ALS)	0.00656303	1	10	0.09	0	1
path:map05033	Nicotine addiction	0.00656303	1	15	0	7	0.18
path:map04964	Proximal tubule bicarbonate reclamation	0.00718579	2	8	0.05	0	1
path:map00072	Synthesis and degradation of ketone bodies	0.0127182	1	2	0.53	0	1
path:map00524	Butirosin and neomycin biosynthesis	0.0127182	1	0	1	0	1
path:map05030	Cocaine addiction	0.0127182	1	12	0.1	0	1
path:map05031	Amphetamine addiction	0.0127182	1	17	0.04	0	1
path:map00230	Purine metabolism	0.0147031	5	42	0.15	26	0.01
path:map05034	Alcoholism	0.0205408	1	23	0.07	0	1
path:map00480	Glutathione metabolism	0.0212891	2	9	0.75	0	1
path:map00760	Nicotinate and nicotinamide metabolism	0.0375868	2	7	0.47	0	1
path:map04721	Synaptic vesicle cycle	0.0405209	1	7	0.76	0	1
