# Supplementary material for: Exceptional Evolutionary Divergence of Human Muscle and Brain Metabolomes Parallels Human Cognitive and Physical Uniqueness
Source: PLoS Biol. 2014 May 27;12(5):e1001871. doi: 10.1371/journal.pbio.1001871 (PMC4035273; doi:10.1371/journal.pbio.1001871)
Supplement: Table S13 — KEGG pathways containing significant overrepresentation of metabolites with human-specific concentration profiles in skeletal muscle. The Table lists: pathways names and IDs, pathway p-Values, numbers of pathway metabolites showing human-specific concentration profiles, numbers of enzymes showing human-specific expression profiles, numbers of pairs of directly linked enzymes and metabolites with human-specific and concentration level profiles, as well as p-Values indicating probabilities of finding equal or greater numbers of enzymes or linked enzymes in metabolites sets randomly sampled 100 times. (XLSX) [file pbio.1001871.s028.xlsx]

## Sheet: muscle
	path	path p-value	human-specific metabolites	human-specific enzymes	enzymes p-value	human-specific linked enzymes	linked enzymes p-value
path:map00640	Propanoate metabolism	0.0414967	23	2	0.38	2	0
path:map00040	Pentose and glucuronate interconversions	0.0492973	18	1	0.69	1	0
path:map00340	Histidine metabolism	0.0492973	16	1	0.72	2	0
path:map05012	Parkinson's disease	0.00980451	7	2	0.95	2	0
path:map00010	Glycolysis / Gluconeogenesis	0.0492973	16	2	0.81	2	0.38
path:map00534	Glycosaminoglycan biosynthesis - heparan sulfate	0	3	2	0.23	0	1
path:map05410	Hypertrophic cardiomyopathy (HCM)	0	2	1	0.61	0	1
path:map00410	beta-Alanine metabolism	0.017398	13	1	0.77	0	1
path:map00190	Oxidative phosphorylation	0.00132357	15	2	0.97	0	1
path:map03013	RNA transport	0	1	0	1	0	1
path:map04973	Carbohydrate digestion and absorption	0.00238076	28	0	1	0	1
path:map00052	Galactose metabolism	0.0133245	20	0	1	0	1
path:map00770	Pantothenate and CoA biosynthesis	0.0419384	11	0	1	0	1
