# Supplementary material for: Exceptional Evolutionary Divergence of Human Muscle and Brain Metabolomes Parallels Human Cognitive and Physical Uniqueness
Source: PLoS Biol. 2014 May 27;12(5):e1001871. doi: 10.1371/journal.pbio.1001871 (PMC4035273; doi:10.1371/journal.pbio.1001871)
Supplement: Table S14 — Functional modules comprised of metabolites and pathways showing human-specific changes in PFC. The modules (metabolite groups) are listed in the order depicted in Figure S10. For each module, metabolites, pathways and enzymes are listed. The difference in concentration levels of each metabolite between humans and chimpanzees and rhesus macaques is given next to the respective metabolite. The negative sign of this difference corresponds to lower concentration levels in humans (shown in blue in Figure S10), while positive sign corresponds to higher concentration levels in humans (shown in red in Figure S10). (XLSX) [file pbio.1001871.s029.xlsx]

## Sheet: Sheet1
MODULE	1
metabolites	name	concentration difference
HMDB00043	Betaine	0.697905
HMDB00883	L-Valine	0.697905
HMDB01382	Vaporole	0.697905
HMDB02141	N-Methyl-a-aminoisobutyric acid	0.697905
HMDB03355	5-Aminopentanoic acid	0.697905
HMDB00509	Senecioic acid	0.697905
HMDB01470	Tiglic acid	0.697905
HMDB01862	2-Ethylacrylic acid	0.697905
HMDB02167	3-Methylbutyrolactone	0.697905
HMDB00167	L-Threonine	0.778431
HMDB00719	L-Homoserine	0.705294
HMDB04041	L-Allothreonine	0.705294
HMDB00005	2-Ketobutyric acid	0.123901
HMDB00060	Acetoacetic acid	0.123901
HMDB01172	2-Methyl-3-oxopropanoic acid	0.123901
HMDB01259	Succinic acid semialdehyde	0.123901
HMDB03381	4-Hydroxycrotonic acid	0.123901
HMDB00734	Indoleacrylic acid	0.743656
HMDB00929	L-Tryptophan	0.890847
HMDB00161	L-Alanine	0.0858934
HMDB00687	L-Leucine	1.3234
HMDB13773	D-Leucine	1.1803
HMDB00172	L-Isoleucine	1.30072
HMDB00162	L-Proline	1.02253
HMDB00696	L-Methionine	1.09619
paths	path name	path enzymes	symbol	name
path:map00970	Aminoacyl-tRNA biosynthesis	57176	VARS2	valyl-tRNA synthetase 2, mitochondrial (putative)
		7407	VARS	valyl-tRNA synthetase
path:map05143	African trypanosomiasis	3043	HBB	hemoglobin, beta
path:map00450	Selenocompound metabolism	9060	PAPSS2	3'-phosphoadenosine 5'-phosphosulfate synthase 2
path:map00280	Valine, leucine and isoleucine degradation	27034	ACAD8	acyl-CoA dehydrogenase family, member 8
path:map04978	Mineral absorption	4501	MT1X	metallothionein 1X
MODULE	2
metabolites	name	concentration difference
HMDB00620	Glutaconic acid	-0.619943
HMDB00634	Citraconic acid	-0.619943
HMDB00749	Mesaconic acid	-0.619943
HMDB02092	Itaconic acid	-0.619943
HMDB03671	2-Heptanone	-0.619943
HMDB00148	L-Glutamic acid	-0.200598
HMDB02393	N-Methyl-D-aspartic acid	-0.223148
HMDB02931	N-Acetylserine	-0.223148
HMDB03339	D-Glutamic acid	-0.223148
HMDB00158	L-Tyrosine	1.11867
HMDB01119	4-Hydroxy-4-(3-pyridyl)-butanoic acid	1.28925
HMDB02184	L-Threo-3-Phenylserine	1.28925
HMDB03831	Beta-Tyrosine	1.28925
HMDB06050	o-Tyrosine	1.28925
HMDB01122	N-Methylformamide	-1.04499
HMDB01250	N-Acetylarylamine	-1.04499
paths	path name	path enzymes	symbol	name
path:map00970	Aminoacyl-tRNA biosynthesis	57176	VARS2	valyl-tRNA synthetase 2, mitochondrial (putative)
		7407	VARS	valyl-tRNA synthetase
path:map05030	Cocaine addiction	90993	CREB3L1	cAMP responsive element binding protein 3-like 1
path:map05034	Alcoholism	90993	CREB3L1	cAMP responsive element binding protein 3-like 1
		2788	GNG7	guanine nucleotide binding protein (G protein), gamma 7
path:map05031	Amphetamine addiction	90993	CREB3L1	cAMP responsive element binding protein 3-like 1
path:map04728	Dopaminergic synapse	90993	CREB3L1	cAMP responsive element binding protein 3-like 1
		2788	GNG7	guanine nucleotide binding protein (G protein), gamma 7
