# Supplementary material for: Exceptional Evolutionary Divergence of Human Muscle and Brain Metabolomes Parallels Human Cognitive and Physical Uniqueness
Source: PLoS Biol. 2014 May 27;12(5):e1001871. doi: 10.1371/journal.pbio.1001871 (PMC4035273; doi:10.1371/journal.pbio.1001871)
Supplement: Table S17 — Functional modules comprised of metabolites and pathways showing human-specific changes in kidney. The modules (metabolite groups) are shown in Figure S12. Organization of the Table is analogous to Table S14. (XLSX) [file pbio.1001871.s032.xlsx]

## Sheet: Sheet1
MODULE	1
metabolites	name	concentration difference
HMDB00020	p-Hydroxyphenylacetic acid	-1.90233
HMDB00440	3-Hydroxyphenylacetic acid	-1.90233
HMDB00669	Ortho-Hydroxyphenylacetic acid	-1.90233
HMDB00703	Mandelic acid	-1.90233
HMDB01101	p-Anisic acid	-1.90233
HMDB02390	3-Cresotinic acid	-1.90233
HMDB03791	3,4-Dihydroxyphenylacetaldehyde	-1.90233
HMDB04815	4-Hydroxy-3-methylbenzoic acid	-1.90233
HMDB00408	2-Methyl-3-ketovaleric acid	-0.73104
HMDB00491	3-Methyl-2-oxovaleric acid	-0.73104
HMDB00695	Ketoleucine	-0.73104
HMDB01864	2-Ketohexanoic acid	-0.73104
paths	path name	path enzymes	symbol	name
path:map00360	Phenylalanine metabolism	1644	DDC	dopa decarboxylase (aromatic L-amino acid decarboxylase)
		3242	HPD	4-hydroxyphenylpyruvate dioxygenase
		4129	MAOB	monoamine oxidase B
		5053	PAH	phenylalanine hydroxylase
path:map00350	Tyrosine metabolism	1644	DDC	dopa decarboxylase (aromatic L-amino acid decarboxylase)
		3242	HPD	4-hydroxyphenylpyruvate dioxygenase
		4129	MAOB	monoamine oxidase B
		126	ADH1C	alcohol dehydrogenase 1C (class I), gamma polypeptide
		316	AOX1	aldehyde oxidase 1
